# Supplementary material for: Nordic Seas polynyas and their role in preconditioning marine productivity during the Last Glacial Maximum
Source: PubMed Central journal article supplement (PMC6160467; doi:10.1038/s41467-018-06252-8), 2018-09-27
Supplement: 41467_2018_6252_MOESM1_ESM.pdf [file 41467_2018_6252_MOESM1_ESM.pdf]

## **SUPPLEMENTARY INFORMATION**

### **Nordic Seas polynyas and their role in preconditioning life during the Last Glacial Maximum**

**Knies et al.**

**Supplementary Table 1:** Details of studied core locations displayed in Figure 1 and 7.

| Station       | Latitude<br>N | Longitude<br>E | Location       | Water depth<br>in meter | Reference                     |
|---------------|---------------|----------------|----------------|-------------------------|-------------------------------|
| GS14-190-01PC | 71.4755       | 16.1650        | SW Barents Sea | 949                     | this study                    |
| 33-GC08       | 71.4753       | 16.1650        | SW Barents Sea | 947                     | this study                    |
| PS2138-1      | 81.5377       | 30.8761        | N Barents Sea  | 995                     | Knies, et al. <sup>1</sup>    |
| MSM05/5_712-2 | 78.9157       | 6.7672         | W Svalbard     | 1389                    | Müller and Stein <sup>2</sup> |
| PS2446-4      | 82.3855       | 40.9013        | N Barents Sea  | 2022                    | Knies, et al. <sup>1</sup>    |
| PS2837-5      | 81.2442       | 2.3903         | NW Svalbard    | 1042                    | Müller, et al. <sup>3</sup>   |

**Supplementary Table 2:** Sedimentological and geochemical raw data of GC14-190-01PC.

| Age (cal. ka BP) | Depth original (cm) | Depth corrected (cm) | $\delta^{18}\text{O}$ N. globoquadrina sin. | No. Planktic Forams/g >125 $\mu\text{m}$ ) |
|------------------|---------------------|----------------------|---------------------------------------------|--------------------------------------------|
| 15.25            | 25.00               | 5                    | 4.66                                        |                                            |
| 15.45            | 33.00               | 13                   | 4.29                                        | 2152                                       |
| 15.69            | 41.00               | 21                   | 4.14                                        | 2752                                       |
| 15.97            | 51.00               | 31                   | 4.04                                        |                                            |
| 16.23            | 61.00               | 41                   | 3.66                                        | 12086                                      |
| 16.41            | 65.50               | 45.5                 | 3.28                                        |                                            |
| 16.64            | 71.00               | 51                   | 3.08                                        |                                            |
| 16.71            | 72.50               | 52.5                 | 2.44                                        |                                            |
| 16.80            | 74.50               | 54.5                 | 3.44                                        |                                            |
| 16.84            | 75.50               | 55.5                 | 3.53                                        |                                            |
| 17.03            | 79.50               | 59.5                 | 2.39                                        |                                            |
| 17.10            | 81.00               | 61                   | 2.68                                        | 6946                                       |
| 17.16            | 82.50               | 62.5                 | 3.45                                        |                                            |
| 17.26            | 84.50               | 64.5                 | 3.46                                        |                                            |
| 17.30            | 85.50               | 65.5                 | 3.47                                        |                                            |
| 17.35            | 86.50               | 66.5                 | 3.45                                        |                                            |
| 17.56            | 91.00               | 71                   | 4.43                                        |                                            |
| 17.68            | 93.50               | 73.5                 | 3.95                                        |                                            |
| 17.72            | 94.50               | 74.5                 | 3.71                                        |                                            |
| 17.97            | 104.10              | 84.1                 | 5.19                                        | 2336                                       |
| 18.19            | 114.10              | 94.1                 | 5.17                                        |                                            |
| 18.44            | 125.10              | 105.1                | 5.17                                        | 328                                        |
| 18.58            | 131.10              | 111.1                | 4.71                                        |                                            |
| 18.86            | 143.10              | 123.1                | 5.07                                        | 1963                                       |
| 19.10            | 153.10              | 133.1                | 5.15                                        |                                            |
| 19.28            | 163.10              | 143.1                | 5.22                                        | 1328                                       |
| 19.43            | 173.10              | 153.1                | 5.07                                        |                                            |
| 19.55            | 182.10              | 162.1                | 5.13                                        | 3296                                       |
| 19.73            | 194.10              | 174.1                | 5.22                                        |                                            |
| 19.88            | 204.00              | 184                  | 5.25                                        | 2684                                       |
| 20.03            | 215.00              | 195                  | 5.14                                        |                                            |
| 20.22            | 225.00              | 205                  | 5.12                                        | 5260                                       |
| 20.40            | 234.00              | 214                  | 5.20                                        |                                            |
| 20.61            | 245.00              | 225                  | 5.22                                        | 2853                                       |
| 20.81            | 255.00              | 235                  | 5.11                                        |                                            |
| 21.06            | 268.00              | 248                  | 5.17                                        | 11349                                      |
| 21.20            | 275.00              | 255                  | 5.12                                        |                                            |
| 21.39            | 285.00              | 265                  | 5.13                                        | 4491                                       |
| 21.57            | 295.00              | 275                  | 4.95                                        |                                            |
| 21.74            | 305.00              | 285                  | 4.99                                        | 3808                                       |
| 21.90            | 315.00              | 295                  | 4.90                                        |                                            |
| 22.09            | 325.00              | 305                  | 4.86                                        | 3733                                       |
| 22.28            | 335.00              | 315                  | 4.90                                        |                                            |
| 22.48            | 345.00              | 325                  | 4.94                                        | 6224                                       |
| 22.66            | 355.00              | 335                  | 4.91                                        |                                            |
| 22.82            | 365.00              | 345                  |                                             | 0                                          |
| 22.98            | 375.00              | 355                  | 4.82                                        |                                            |
| 23.17            | 388.00              | 368                  | 4.98                                        | 130                                        |
| 23.30            | 396.20              | 376.2                | 4.80                                        |                                            |
| 23.46            | 407.20              | 387.2                | 4.85                                        | 13896                                      |
| 23.58            | 415.20              | 395.2                | 4.85                                        |                                            |
| 23.71            | 423.20              | 403.2                | 4.78                                        | 7940                                       |
| 23.83            | 431.20              | 411.2                | 4.81                                        |                                            |
| 23.96            | 440.20              | 420.2                | 4.85                                        | 25680                                      |

|       |        |       |      |       |
|-------|--------|-------|------|-------|
| 24.13 | 451.20 | 431.2 | 4.84 |       |
| 24.27 | 461.20 | 441.2 | 5.02 | 5072  |
| 24.39 | 469.20 | 449.2 | 4.90 |       |
| 24.54 | 478.20 | 458.2 | 4.80 | 13696 |
| 24.75 | 488.20 | 468.2 | 4.86 |       |
| 24.91 | 496.00 | 476   | 4.78 | 2864  |
| 25.09 | 505.00 | 485   | 4.63 |       |
| 25.29 | 515.00 | 495   | 4.37 | 17376 |
| 25.49 | 525.00 | 505   | 4.81 |       |
| 25.64 | 533.00 | 513   | 4.78 | 9344  |
| 25.82 | 543.00 | 523   | 4.79 |       |
| 26.01 | 553.00 | 533   | 4.74 | 3416  |
| 26.32 | 563.00 | 543   | 4.92 |       |
| 26.56 | 570.00 | 550   | 4.78 | 1760  |
| 26.99 | 583.00 | 563   | 4.76 |       |
| 27.34 | 593.60 | 573.6 | 4.73 | 7648  |
| 27.68 | 603.60 | 583.6 | 4.80 |       |
| 27.94 | 611.60 | 591.6 | 4.63 | 16155 |
| 28.29 | 622.60 | 602.6 | 4.41 |       |
| 28.60 | 631.60 | 611.6 | 4.57 | 5424  |
| 28.97 | 642.60 | 622.6 | 4.30 |       |
| 29.31 | 652.60 | 632.6 | 3.98 | 1384  |
| 29.58 | 662.60 | 642.6 | 3.49 |       |
| 29.85 | 672.60 | 652.6 | 3.82 | 32    |
| 30.12 | 682.60 | 662.6 | 4.98 |       |
| 30.31 | 689.60 | 669.6 | 4.56 | 1508  |
| 30.63 | 701.40 | 681.4 | 4.63 |       |

| Age<br>(cal. ka BP) | Depth original<br>(cm) | Depth corrected<br>(cm) | Grain size >250 (wt.%) | IP25 (µg/g sed.) |
|---------------------|------------------------|-------------------------|------------------------|------------------|
| 15.57               | 37                     | 17                      | 2.6                    | 0.0000           |
| 15.91               | 49                     | 29                      | 1.2                    | 0.0006           |
| 16.12               | 57                     | 37                      | 1.9                    | 0.0005           |
| 16.35               | 64                     | 44                      | 3.8                    | 0.0005           |
| 16.82               | 75                     | 55                      | 8.1                    | 0.0000           |
| 17.14               | 82                     | 62                      | 0                      | 0.0010           |
| 17.61               | 92                     | 72                      | 0.4                    | 0.0006           |
| 17.81               | 97                     | 77                      | 4.6                    | 0.0000           |
| 18.01               | 106                    | 86.1                    | 4.9                    | 0.0017           |
| 18.23               | 116                    | 96.1                    | 1.8                    | 0.0019           |
| 18.47               | 126                    | 106.1                   | 0                      | 0.0018           |
| 18.74               | 138                    | 118.1                   | 4.6                    | 0.0029           |
| 18.95               | 147                    | 127.1                   | 2.8                    | 0.0025           |
| 19.18               | 157                    | 137.1                   | 2.6                    | 0.0025           |
| 19.35               | 168                    | 148.1                   | 7.3                    | 0.0023           |
| 19.50               | 178                    | 158.1                   | 10.6                   | 0.0028           |
| 19.63               | 187                    | 167.1                   | 24.6                   | 0.0035           |
| 19.78               | 197                    | 177.1                   | 1.6                    | 0.0024           |
| 19.85               | 202                    | 182                     | 1.2                    | 0.0025           |
| 19.99               | 212                    | 192                     | 0.01                   | 0.0039           |
| 20.17               | 222                    | 202                     | 1.9                    | 0.0022           |
| 20.36               | 232                    | 212                     | 0.7                    | 0.0053           |
| 20.55               | 242                    | 222                     | 1.1                    | 0.0045           |
| 20.75               | 252                    | 232                     | 1                      | 0.0064           |
| 20.94               | 262                    | 242                     | 0                      | 0.0048           |
| 21.14               | 272                    | 252                     | 0.1                    | 0.0016           |
| 21.34               | 282                    | 262                     | 7.1                    | 0.0037           |
| 21.45               | 288                    | 268                     | 0                      | 0.0051           |
| 21.59               | 296                    | 276                     | 3.7                    | 0.0032           |
| 21.75               | 306                    | 286                     | 9.6                    | 0.0013           |
| 21.92               | 316                    | 296                     | 2.8                    | 0.0027           |
| 22.11               | 326                    | 306                     | 6.5                    | 0.0028           |
| 22.30               | 336                    | 316                     | 5.7                    | 0.0033           |
| 22.50               | 346                    | 326                     | 7.8                    | 0.0023           |
| 22.68               | 356                    | 336                     | 0.6                    | 0.0025           |
| 22.84               | 366                    | 346                     | 1.6                    | 0.0022           |
| 22.99               | 376                    | 356                     | 0                      | 0.0015           |
| 23.14               | 386                    | 366                     | 0                      | 0.0026           |
| 23.30               | 396                    | 376.2                   | 8.7                    | 0.0040           |
| 23.52               | 411                    | 391.2                   | 4.9                    | 0.0022           |
| 23.67               | 421                    | 401.2                   | 2.1                    | 0.0074           |
| 23.83               | 431                    | 411.2                   | 4.9                    | 0.0064           |
| 23.97               | 441                    | 421.2                   | 15.1                   | 0.0053           |
| 24.13               | 451                    | 431.2                   | 6.8                    | 0.0031           |
| 24.27               | 461                    | 441.2                   | 8.7                    | 0.0030           |
| 24.39               | 469                    | 449.2                   | 8.2                    | 0.0032           |
| 24.56               | 479                    | 459.2                   | 5.4                    | 0.0026           |
| 24.77               | 489                    | 469.2                   | 5.7                    | 0.0042           |
| 24.89               | 495                    | 475                     | 3.4                    | 0.0047           |
| 25.09               | 505                    | 485                     | 6.7                    | 0.0012           |
| 25.29               | 515                    | 495                     | 2.1                    | 0.0000           |
| 25.49               | 525                    | 505                     | 0.6                    | 0.0032           |
| 25.64               | 533                    | 513                     | 17.8                   | 0.0019           |
| 25.82               | 543                    | 523                     | 0.9                    | 0.0018           |
| 26.01               | 553                    | 533                     | 2.2                    | 0.0000           |
| 26.32               | 563                    | 543                     | 0.1                    | 0.0027           |

|       |     |       |      |        |
|-------|-----|-------|------|--------|
| 26.59 | 571 | 551   | 2.4  | 0.0020 |
| 27.06 | 585 | 565   | 0.01 | 0.0024 |
| 27.41 | 596 | 575.6 | 2.3  | 0.0007 |
| 27.74 | 606 | 585.6 | 2.2  | 0.0007 |
| 28.07 | 616 | 595.6 | 1.4  | 0.0026 |
| 28.39 | 626 | 605.6 | 0.5  | 0.0006 |
| 28.74 | 636 | 615.6 | 0.6  | 0.0031 |
| 29.07 | 646 | 625.6 | 3.3  | 0.0020 |
| 29.40 | 656 | 635.6 | 6.3  | 0.0011 |
| 29.66 | 666 | 645.6 | 2.7  | 0.0008 |
| 29.93 | 676 | 655.6 | 0.4  | 0.0000 |
| 30.20 | 686 | 665.6 | 0.4  | 0.0000 |
| 30.41 | 693 | 673.4 | 2.8  | 0.0016 |
| 30.68 | 703 | 683.4 | 1.9  | 0.0015 |
| 30.88 | 710 | 690.4 | 3.4  | 0.0019 |

| Age<br>(cal. ka BP) | Depth original<br>(cm) | Depth corrected<br>(cm) | Dinosterol ( $\mu\text{g/g sed.}$ ) |
|---------------------|------------------------|-------------------------|-------------------------------------|
| 15.61               | 38.50                  | 18.5                    | 0.0528                              |
| 15.73               | 42.50                  | 22.5                    | 0.0785                              |
| 15.88               | 47.80                  | 27.8                    | 0.0763                              |
| 15.95               | 50.50                  | 30.5                    | 0.0516                              |
| 16.30               | 62.80                  | 42.8                    | 0.0425                              |
| 16.35               | 64.00                  | 44                      | 0.0376                              |
| 16.41               | 65.50                  | 45.5                    | 0.0178                              |
| 16.66               | 71.50                  | 51.5                    | 0.0117                              |
| 16.82               | 75.00                  | 55                      | 0.0108                              |
| 16.88               | 76.30                  | 56.3                    | 0.0031                              |
| 17.03               | 79.50                  | 59.5                    | 0.0050                              |
| 17.14               | 82.00                  | 62                      | 0.0084                              |
| 17.21               | 83.50                  | 63.5                    | 0.0095                              |
| 17.30               | 85.50                  | 65.5                    | 0.0163                              |
| 17.58               | 91.50                  | 71.5                    | 0.0111                              |
| 17.61               | 92.00                  | 72                      | 0.0050                              |
| 17.73               | 94.80                  | 74.8                    | 0.0045                              |
| 17.81               | 97.00                  | 77                      | 0.0039                              |
| 17.99               | 104.80                 | 84.8                    | 0.0082                              |
| 18.20               | 114.50                 | 94.5                    | 0.0321                              |
| 18.23               | 116.10                 | 96.1                    | 0.0461                              |
| 18.29               | 118.50                 | 98.5                    | 0.0308                              |
| 18.36               | 121.50                 | 101.5                   | 0.0310                              |
| 18.43               | 124.50                 | 104.5                   | 0.0309                              |
| 18.47               | 126.10                 | 106.1                   | 0.0372                              |
| 18.50               | 127.50                 | 107.5                   | 0.0234                              |
| 18.57               | 130.50                 | 110.5                   | 0.0242                              |
| 18.64               | 133.80                 | 113.8                   | 0.0295                              |
| 18.74               | 138.10                 | 118.1                   | 0.0272                              |
| 18.85               | 142.50                 | 122.5                   | 0.0359                              |
| 18.95               | 147.10                 | 127.1                   | 0.0581                              |
| 19.04               | 150.50                 | 130.5                   | 0.0538                              |
| 19.15               | 155.50                 | 135.5                   | 0.0544                              |
| 19.22               | 159.30                 | 139.3                   | 0.0657                              |
| 19.35               | 168.10                 | 148.1                   | 0.0490                              |
| 19.42               | 172.50                 | 152.5                   | 0.0667                              |
| 19.49               | 177.50                 | 157.5                   | 0.0927                              |
| 19.53               | 180.50                 | 160.5                   | 0.0667                              |
| 19.65               | 188.50                 | 168.5                   | 0.0607                              |
| 19.77               | 196.50                 | 176.5                   | 0.0700                              |
| 19.81               | 199.50                 | 179.5                   | 0.0684                              |
| 19.99               | 212.00                 | 192                     | 0.0647                              |
| 20.17               | 222.00                 | 202                     | 0.0530                              |
| 20.36               | 232.00                 | 212                     | 0.0456                              |
| 20.55               | 242.00                 | 222                     | 0.0688                              |
| 20.75               | 252.00                 | 232                     | 0.0758                              |
| 20.94               | 262.00                 | 242                     | 0.0722                              |
| 21.14               | 272.00                 | 252                     | 0.0566                              |
| 21.34               | 282.00                 | 262                     | 0.0417                              |
| 21.45               | 288.00                 | 268                     | 0.0385                              |
| 21.55               | 293.50                 | 273.5                   | 0.0441                              |
| 21.59               | 296.00                 | 276                     | 0.0518                              |
| 21.61               | 297.50                 | 277.5                   | 0.0456                              |
| 21.69               | 302.50                 | 282.5                   | 0.0603                              |
| 21.77               | 307.50                 | 287.5                   | 0.0518                              |
| 21.90               | 314.50                 | 294.5                   | 0.0717                              |

|       |        |       |        |
|-------|--------|-------|--------|
| 21.97 | 318.50 | 298.5 | 0.0663 |
| 22.04 | 322.50 | 302.5 | 0.0464 |
| 22.16 | 328.50 | 308.5 | 0.0517 |
| 22.24 | 332.50 | 312.5 | 0.0675 |
| 22.30 | 336.00 | 316   | 0.0560 |
| 22.43 | 342.50 | 322.5 | 0.0532 |
| 22.52 | 347.50 | 327.5 | 0.0436 |
| 22.62 | 352.50 | 332.5 | 0.0481 |
| 22.72 | 358.50 | 338.5 | 0.0418 |
| 22.84 | 366.00 | 346   | 0.0272 |
| 22.91 | 370.50 | 350.5 | 0.0509 |
| 22.97 | 374.50 | 354.5 | 0.0369 |
| 23.06 | 380.50 | 360.5 | 0.0333 |
| 23.11 | 383.50 | 363.5 | 0.0453 |
| 23.17 | 387.50 | 367.5 | 0.0347 |
| 23.30 | 396.20 | 376.2 | 0.0806 |
| 23.52 | 411.20 | 391.2 | 0.0680 |
| 23.67 | 421.20 | 401.2 | 0.0731 |
| 23.83 | 431.20 | 411.2 | 0.0686 |
| 23.97 | 441.20 | 421.2 | 0.0577 |
| 24.13 | 451.20 | 431.2 | 0.0502 |
| 24.27 | 461.20 | 441.2 | 0.0747 |
| 24.39 | 469.20 | 449.2 | 0.0446 |
| 24.56 | 479.20 | 459.2 | 0.0892 |
| 24.77 | 489.20 | 469.2 | 0.0655 |
| 24.89 | 495.00 | 475   | 0.1050 |
| 25.09 | 505.00 | 485   | 0.0654 |
| 25.64 | 533.00 | 513   | 0.0144 |
| 25.82 | 543.00 | 523   | 0.0074 |
| 26.32 | 563.00 | 543   | 0.0570 |
| 26.59 | 571.00 | 551   | 0.0581 |
| 27.06 | 585.00 | 565   | 0.0707 |
| 27.41 | 595.60 | 575.6 | 0.0441 |
| 27.74 | 605.60 | 585.6 | 0.0475 |
| 28.07 | 615.60 | 595.6 | 0.0606 |
| 28.74 | 635.60 | 615.6 | 0.0628 |
| 29.07 | 645.60 | 625.6 | 0.0549 |
| 29.40 | 655.60 | 635.6 | 0.0193 |
| 29.66 | 665.60 | 645.6 | 0.0230 |
| 29.93 | 675.60 | 655.6 | 0.0237 |
| 30.20 | 685.60 | 665.6 | 0.0324 |
| 30.41 | 693.40 | 673.4 | 0.0258 |

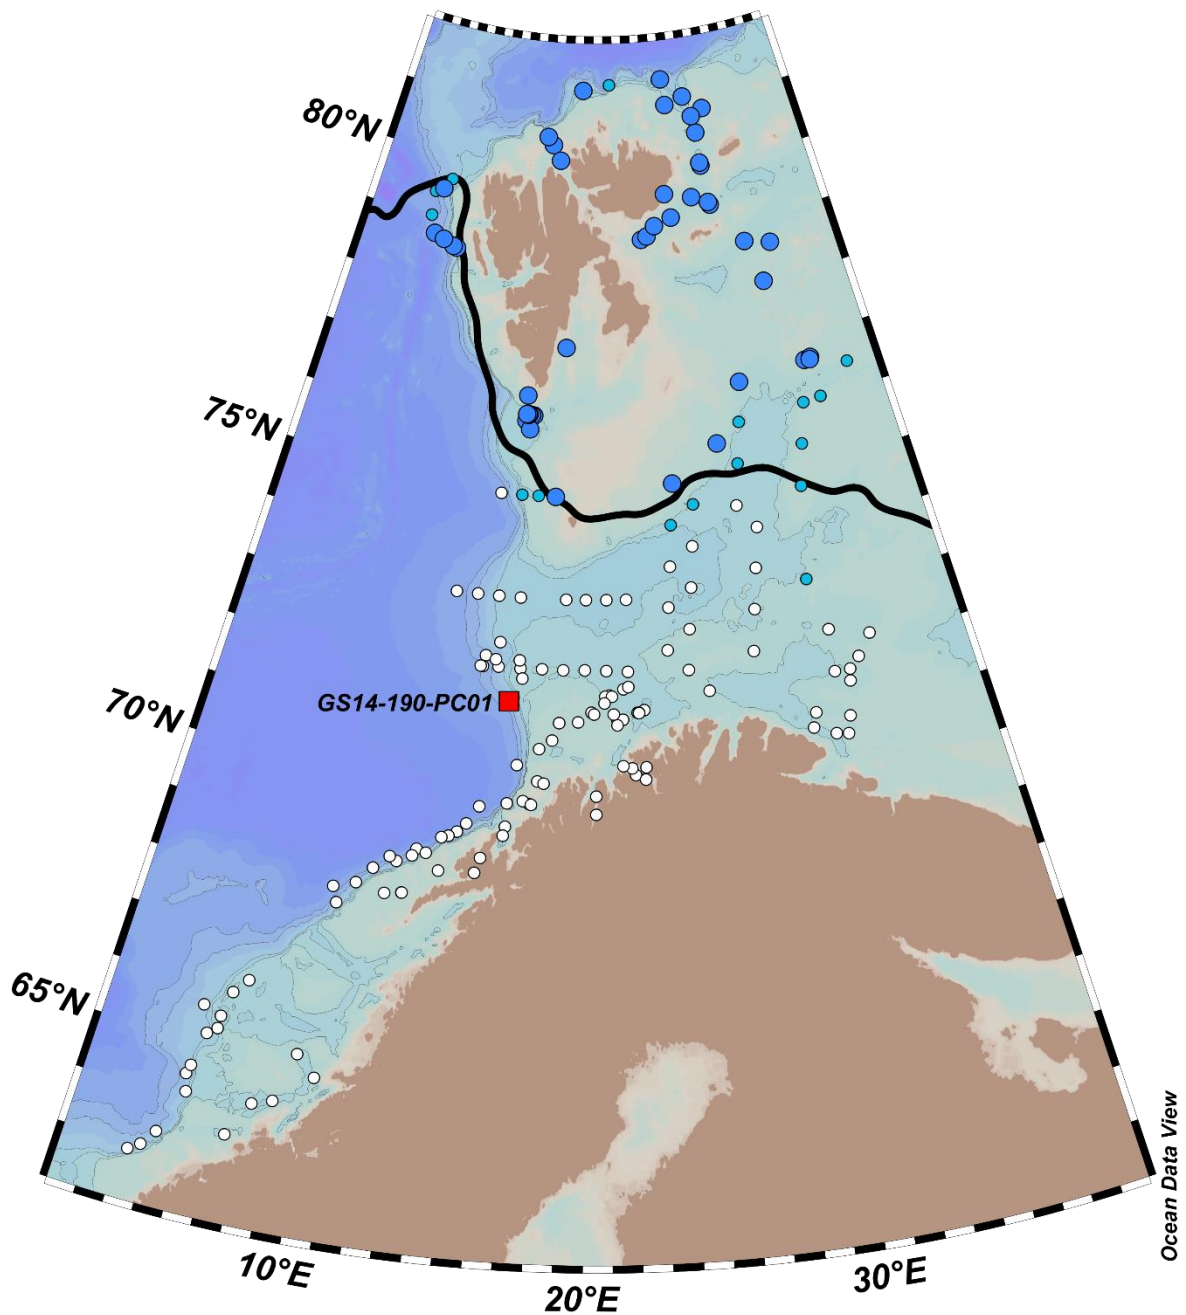

**Supplementary Figure 1:** Map showing the absence and presence of IP<sub>25</sub> in surface samples (0-1 cm) in the Norwegian and Barents Sea<sup>4</sup> as well as the difference to the mean concentration in all IP<sub>25</sub> containing sediments (large blue circles are above the mean IP<sub>25</sub> value; small blue circles are below the mean IP<sub>25</sub> value). The location of piston core GS14-190-01PC is marked. Lateral transport by bottom currents along-slope or down-slope do not influence the surface pattern of IP<sub>25</sub> concentration. Its concentration is primarily controlled by the presence or absence of sea ice and vertical transport of particulate organic material through the water column.



## Supplementary References

- 1 Knies, J., Kleiber, H. P., Matthiessen, J., Muller, C. & Nowaczyk, N. Marine ice-rafted debris records constrain maximum extent of Saalian and Weichselian ice-sheets along the northern Eurasian margin. *Global and Planetary Change* **31**, 45-64, doi:10.1016/s0921-8181(01)00112-6 (2001).
- 2 Müller, J. & Stein, R. High-resolution record of late glacial and deglacial sea ice changes in Fram Strait corroborates ice-ocean interactions during abrupt climate shifts. *Earth and Planetary Science Letters* **403**, 446-455, doi:10.1016/j.epsl.2014.07.016 (2014).
- 3 Müller, J., Masse, G., Stein, R. & Belt, S. T. Variability of sea-ice conditions in the Fram Strait over the past 30,000 years. *Nature Geoscience* **2**, 772-776, doi:10.1038/ngeo665 (2009).
- 4 Köseoğlu, D. *et al.* Complementary biomarker-based methods for characterising Arctic sea ice conditions: A case study comparison between multivariate analysis and the PIP25 index. *Geochimica et Cosmochimica Acta* **222**, 406-420 (2018).
